# Supplementary material
Source: PubMed Central journal article supplement (PMC4350022)

**Figure S1:**

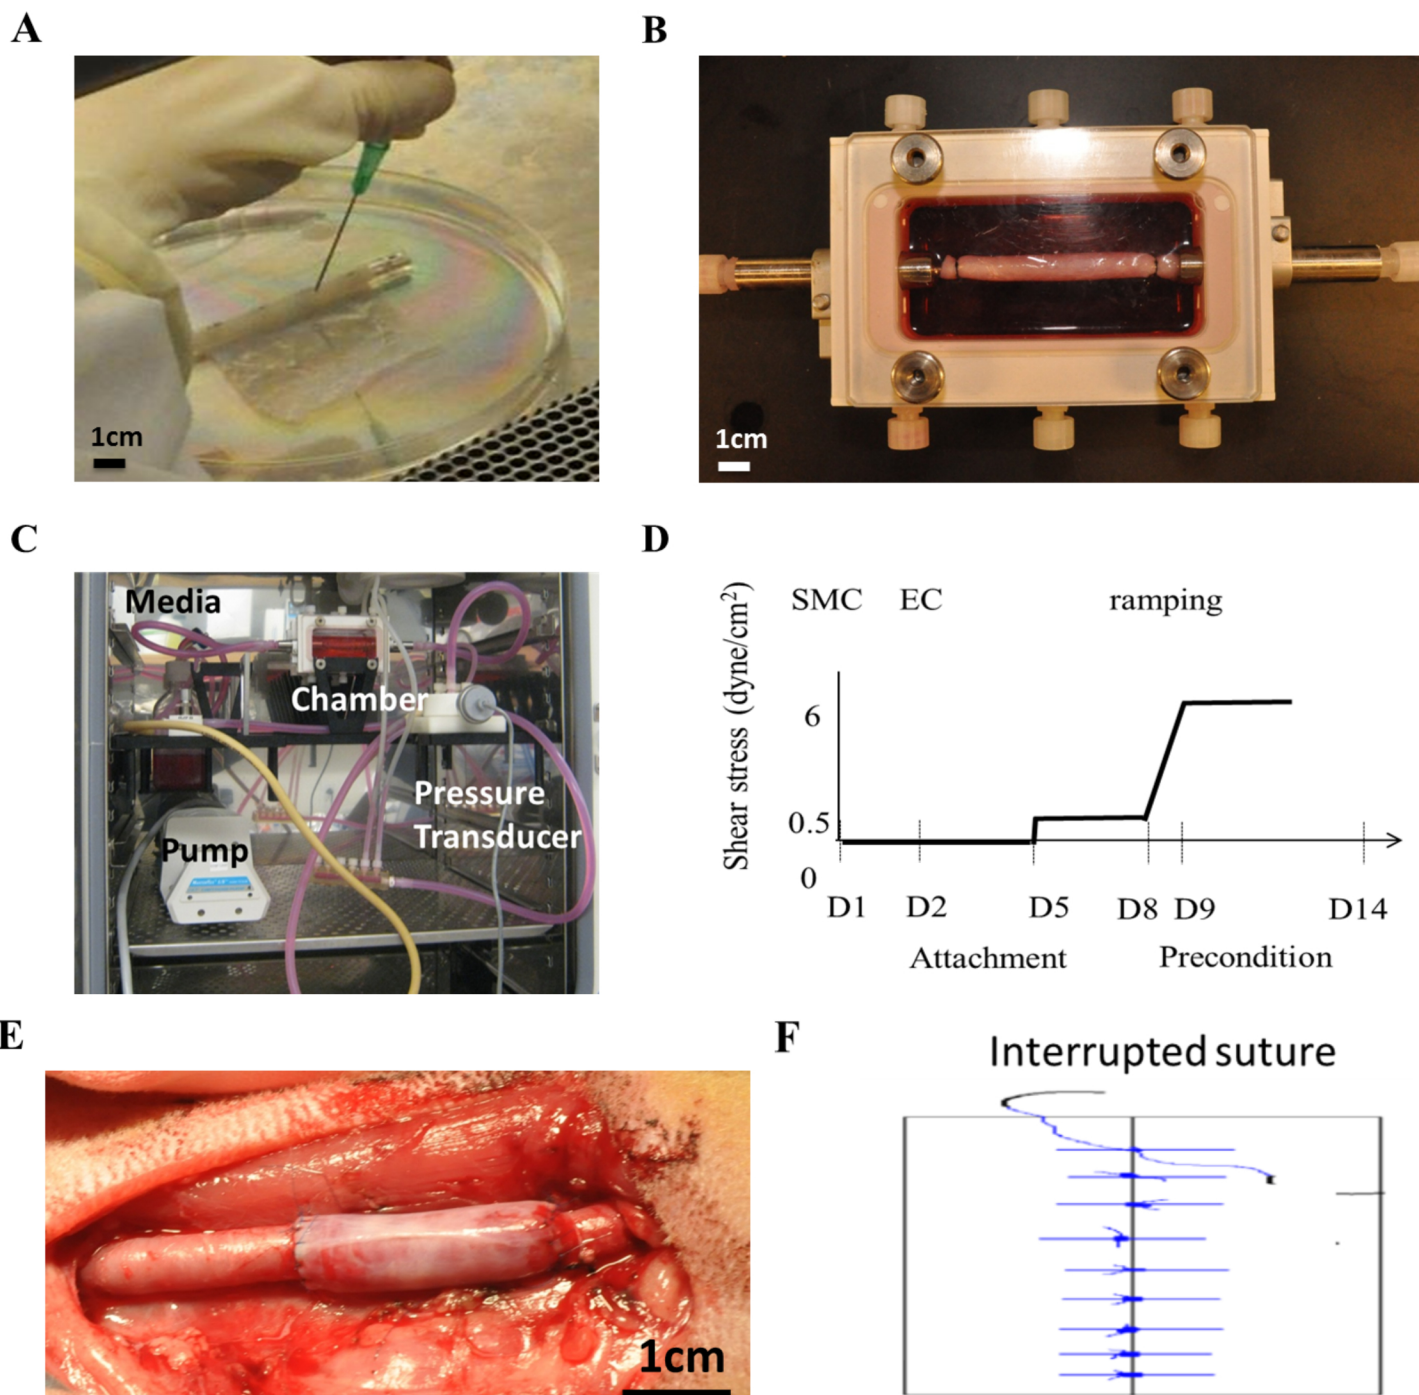

**Figure S2:**

**A**

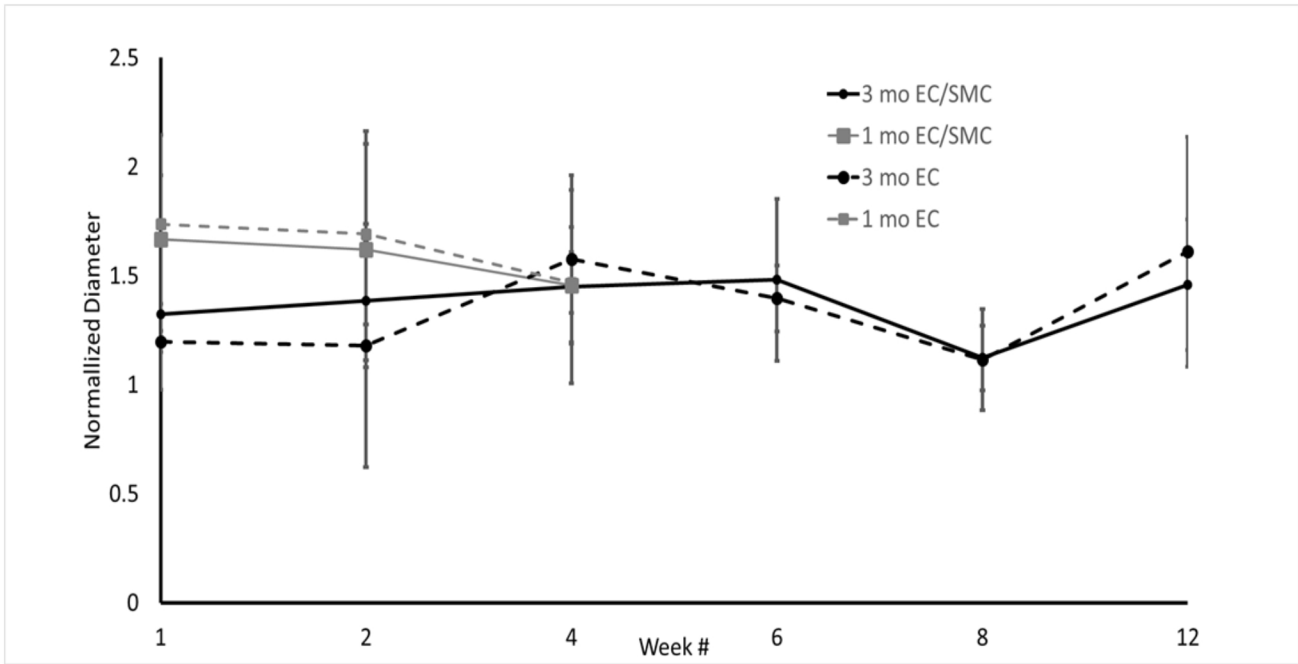

**B**

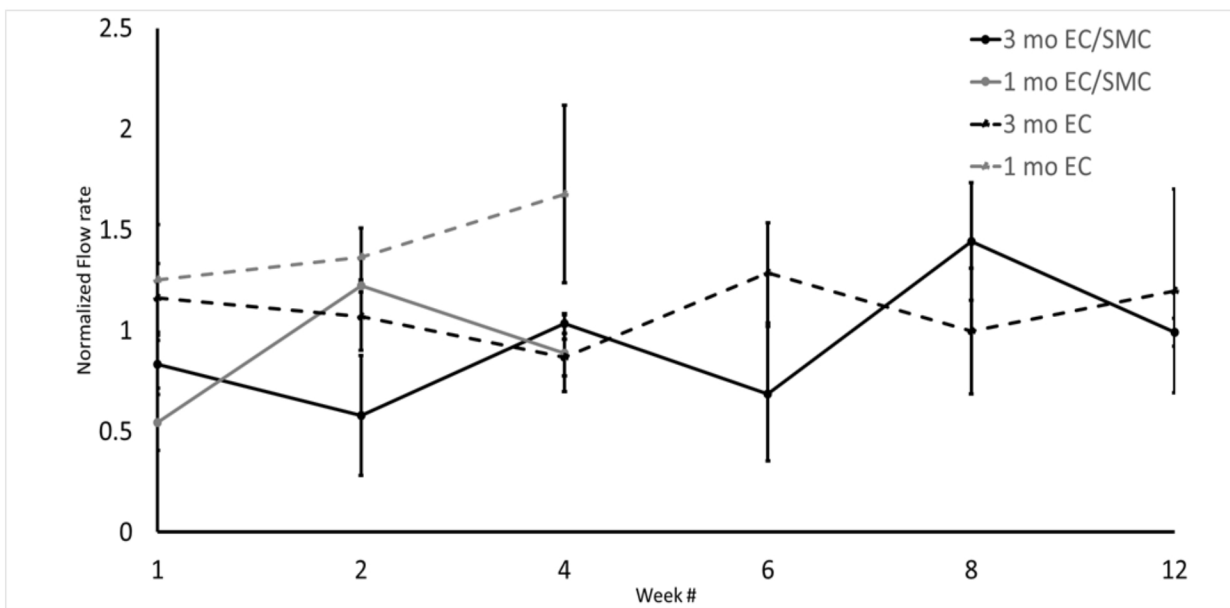

**Figure S3:**

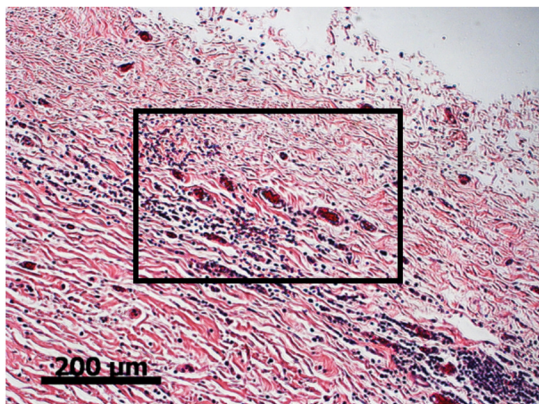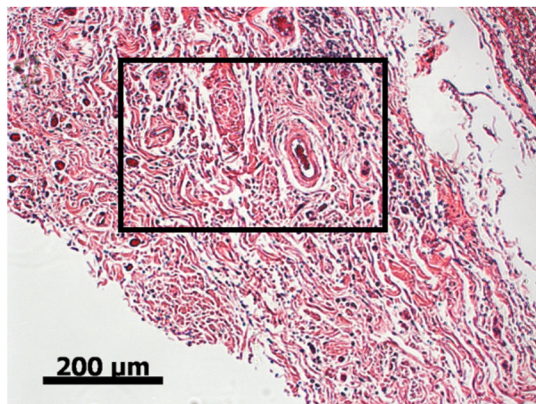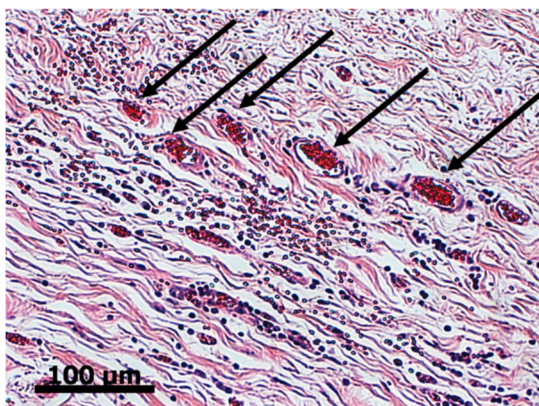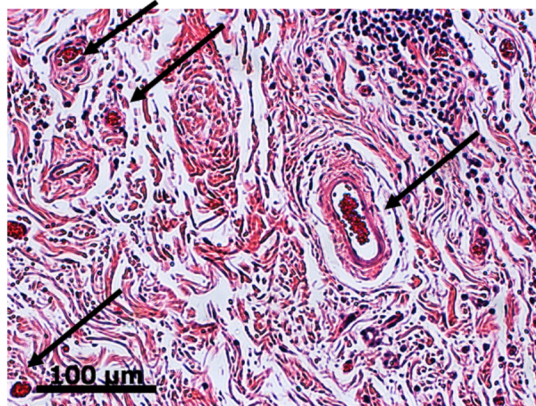

**Figure S4:**

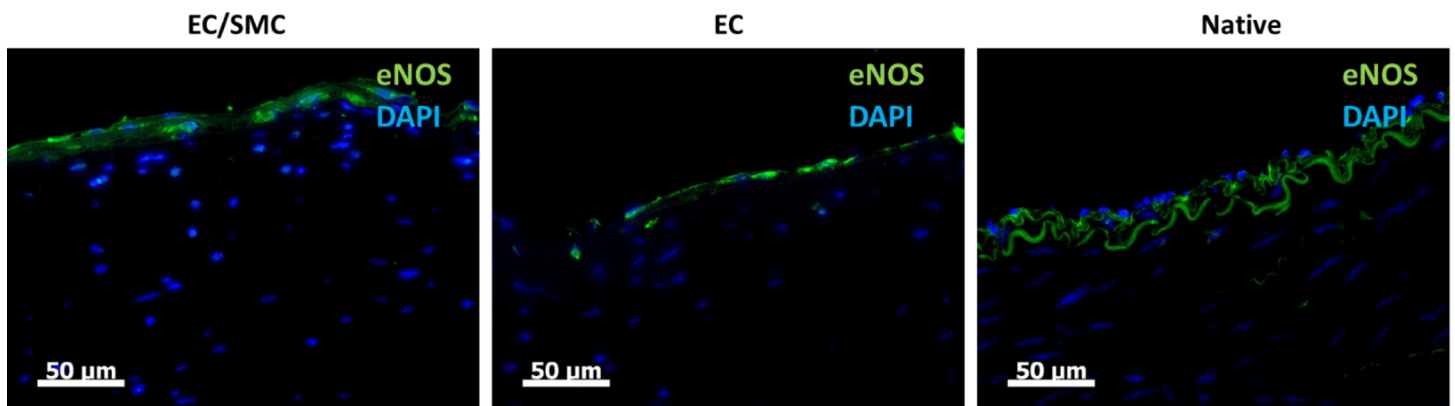

Supplement: NIHMS665120-supplement-5.pdf [file NIHMS665120-supplement-5.pdf]
